# Supplementary material
Source: publisher site journal article supplement (http://static.cambridge.org/content/id/urn:cambridge.org:id:article:S0007114520001324/resource/name/S0007114520001324supp001.docx)
Supplement: Supplementary file 1 [file S0007114520001324supp001.docx]

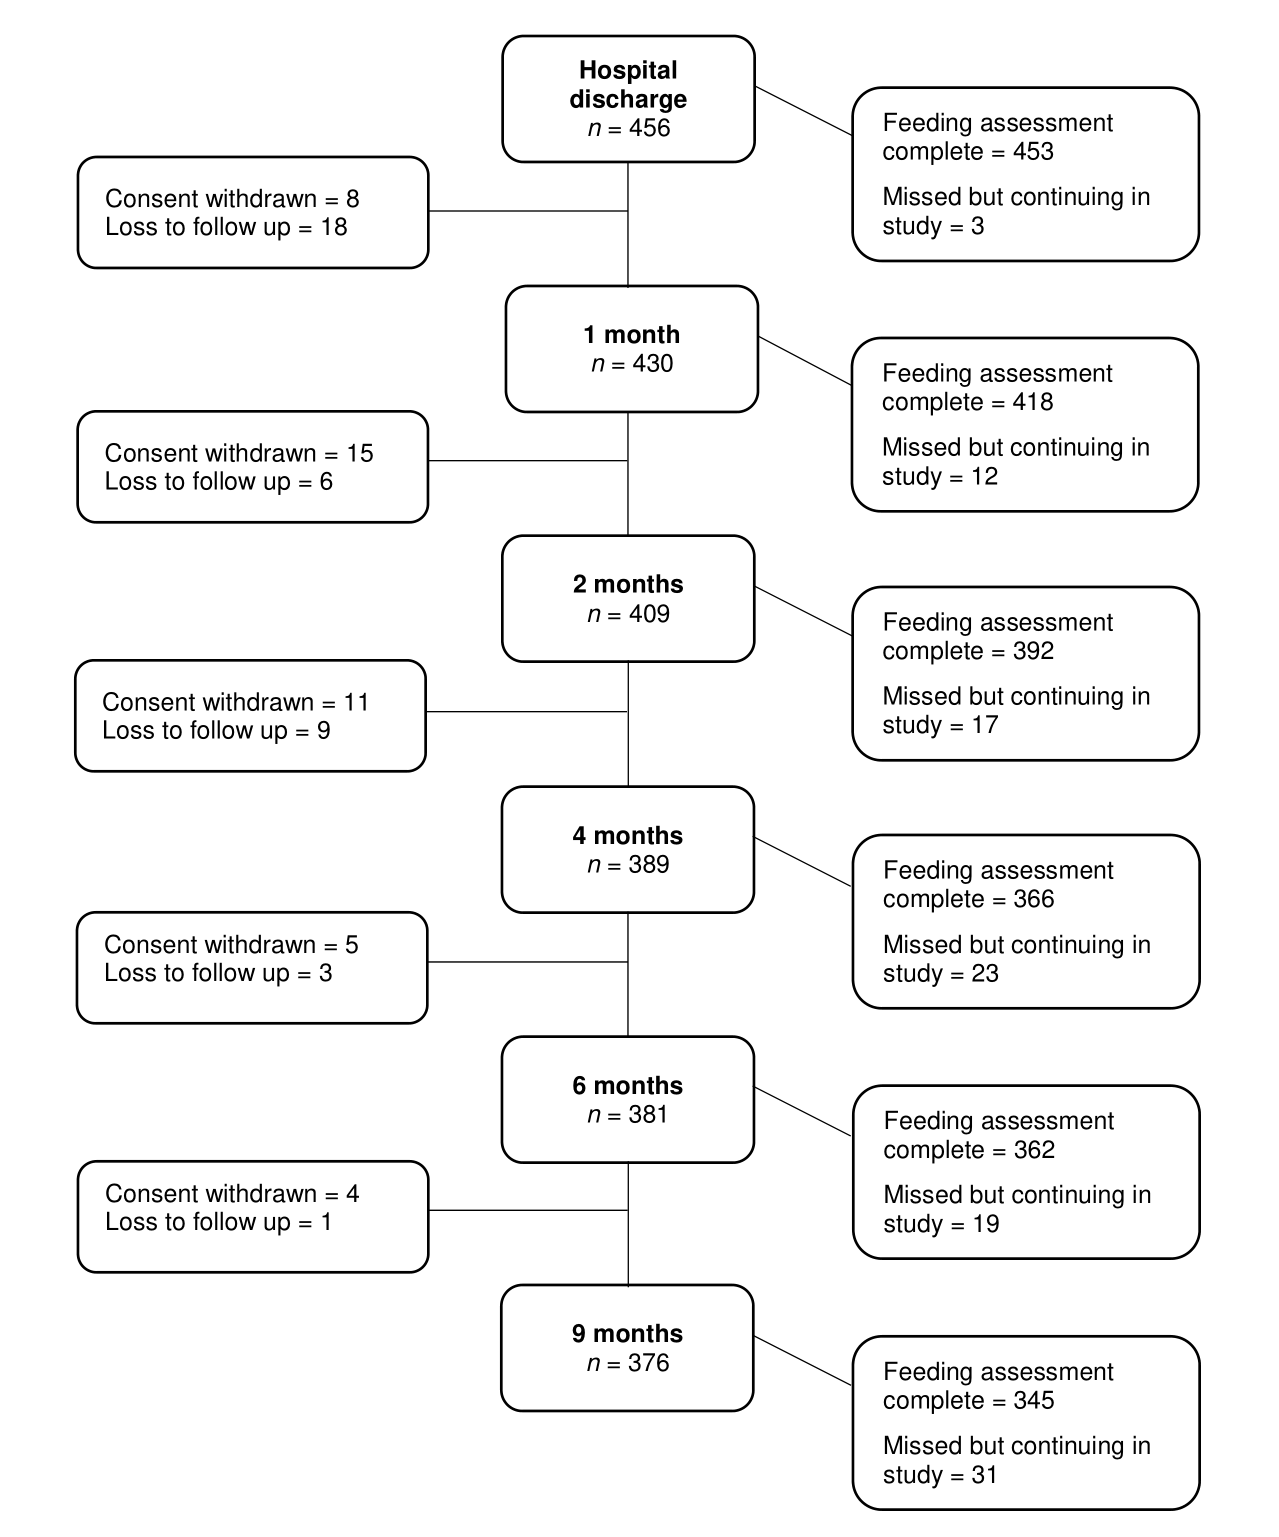


**Supplementary Figure 1**. Flow chart of participants in the COMBINE birth cohort study to 9 months

**Supplementary Table S1**.Reasons for breastfeeding cessation in the COMBINE birth cohort study

| Reason | % |
| --- | --- |
| Faltering growth/insufficient milk supply | 27.4 |
| Latch difficulties | 11.4 |
| Planned to stop at this age | 11.0 |
| Too time consuming/inconvenient/night feeds | 10.5 |
| Infection or sore, cracked and/or bleeding nipples | 10.0 |
| Return to work | 8.2 |
| Maternal illness/medication | 6.8 |
| Baby self-weaned/lost interest | 6.8 |
| Personal reasons (didn’t like it/was embarrassed) | 5.5 |
| Baby was ill, had colic, reflux or tongue-tie | 4.5 |
| Advised by a healthcare professional | 4.1 |
| Reason for breastfeeding cessation in participants who ceased breastfeeding by the 9 month visit (*n* = 220). Participants may have provided more than one reason. | |

**Supplementary Table S2**. Supplementary fluid use in the COMBINE birth cohort study

|  | 1 month  (*n* = 418) | 2 months  (*n* = 392) | 4 months  (*n* = 366) | 6 months  (*n* = 363) |
| --- | --- | --- | --- | --- |
| *Supplementary Fluids (%)*  Water1  Sugary water1  Herbal teas1  Fruit juice1 | *34.0*  81.7  20.4  7.0  2.1 | *41.1*  83.9  21.1  9.3  3.7 | *42.3*  85.7  11.0  8.4  5.8 | *70.2*  94.5  6.3  4.3  11.4 |
| Data refer to since last visit.  1In those who gave supplementary fluids. | | | | |
